# Supplementary material for: Antibacterial activity and effect on gingival cells of microwave-pulsed non-thermal atmospheric pressure plasma in artificial saliva
Source: PubMed Central journal article supplement (PMC5567204; doi:10.1038/s41598-017-08725-0), 2017-08-21
Supplement: 41598_2017_8725_MOESM2_ESM.pdf [file 41598_2017_8725_MOESM2_ESM.pdf]

Supplementary Information

**Antibacterial activity and effect on gingival cells of microwave-pulsed non-thermal atmospheric pressure plasma in artificial saliva**

Sang-Hee Seo<sup>1,2</sup>, Ihn Han<sup>3</sup>, Han Seol Lee<sup>3</sup>, Jin Joo Choi<sup>3</sup>, Eun Ha Choi<sup>3</sup>, Kyoung-Nam Kim<sup>1,2</sup>, Gyungsoon Park<sup>3</sup>, Kwang-Mahn Kim<sup>1,2</sup>

<sup>1</sup> Department and Research Institute of Dental Biomaterials and Bioengineering, Yonsei University College of Dentistry, Seoul, 03722, Korea

<sup>2</sup> BK21 PLUS Project, Yonsei University College of Dentistry, Seoul, 03722, Korea

<sup>3</sup> Plasma Bioscience Research Center, Kwangwoon University, Seoul, 01897, Korea

**Supplementary Table S2. Modified artificial saliva solutions with individual components**

**omitted**

| Omitted component                                   | Components                                          | Concentration (mM) |
|-----------------------------------------------------|-----------------------------------------------------|--------------------|
| NaCl                                                | KCl                                                 | 5.4                |
|                                                     | CaCl <sub>2</sub> ·2H <sub>2</sub> O                | 5.4                |
|                                                     | NaH <sub>2</sub> PO <sub>4</sub> ·2H <sub>2</sub> O | 5.0                |
|                                                     | Na <sub>2</sub> S·9H <sub>2</sub> O                 | 0.021              |
|                                                     | Urea                                                | 16.5               |
| KCl                                                 | NaCl                                                | 6.8                |
|                                                     | CaCl <sub>2</sub> ·2H <sub>2</sub> O                | 5.4                |
|                                                     | NaH <sub>2</sub> PO <sub>4</sub> ·2H <sub>2</sub> O | 5.0                |
|                                                     | Na <sub>2</sub> S·9H <sub>2</sub> O                 | 0.021              |
|                                                     | Urea                                                | 16.5               |
| CaCl <sub>2</sub> ·2H <sub>2</sub> O                | NaCl                                                | 6.8                |
|                                                     | KCl                                                 | 5.4                |
|                                                     | NaH <sub>2</sub> PO <sub>4</sub> ·2H <sub>2</sub> O | 5.0                |
|                                                     | Na <sub>2</sub> S·9H <sub>2</sub> O                 | 0.021              |
|                                                     | Urea                                                | 16.5               |
| NaH <sub>2</sub> PO <sub>4</sub> ·2H <sub>2</sub> O | NaCl                                                | 6.8                |
|                                                     | KCl                                                 | 5.4                |
|                                                     | CaCl <sub>2</sub> ·2H <sub>2</sub> O                | 5.4                |
|                                                     | Na <sub>2</sub> S·9H <sub>2</sub> O                 | 5.0                |
|                                                     | Urea                                                | 16.5               |
| Na <sub>2</sub> S·9H <sub>2</sub> O                 | NaCl                                                | 6.8                |
|                                                     | KCl                                                 | 5.4                |
|                                                     | CaCl <sub>2</sub> ·2H <sub>2</sub> O                | 5.4                |
|                                                     | NaH <sub>2</sub> PO <sub>4</sub> ·2H <sub>2</sub> O | 5.0                |
|                                                     | Urea                                                | 16.5               |
| Urea                                                | NaCl                                                | 6.8                |
|                                                     | KCl                                                 | 5.4                |
|                                                     | CaCl <sub>2</sub> ·2H <sub>2</sub> O                | 5.4                |
|                                                     | NaH <sub>2</sub> PO <sub>4</sub> ·2H <sub>2</sub> O | 5.0                |
|                                                     | Na <sub>2</sub> S·9H <sub>2</sub> O                 | 0.021              |
